# Supplementary material for: Phylogenomics picks out the par excellence markers for species phylogeny in the genus Staphylococcus
Source: PubMed Central journal article supplement (PMC6203942; doi:10.7717/peerj.5839), 2018-10-24

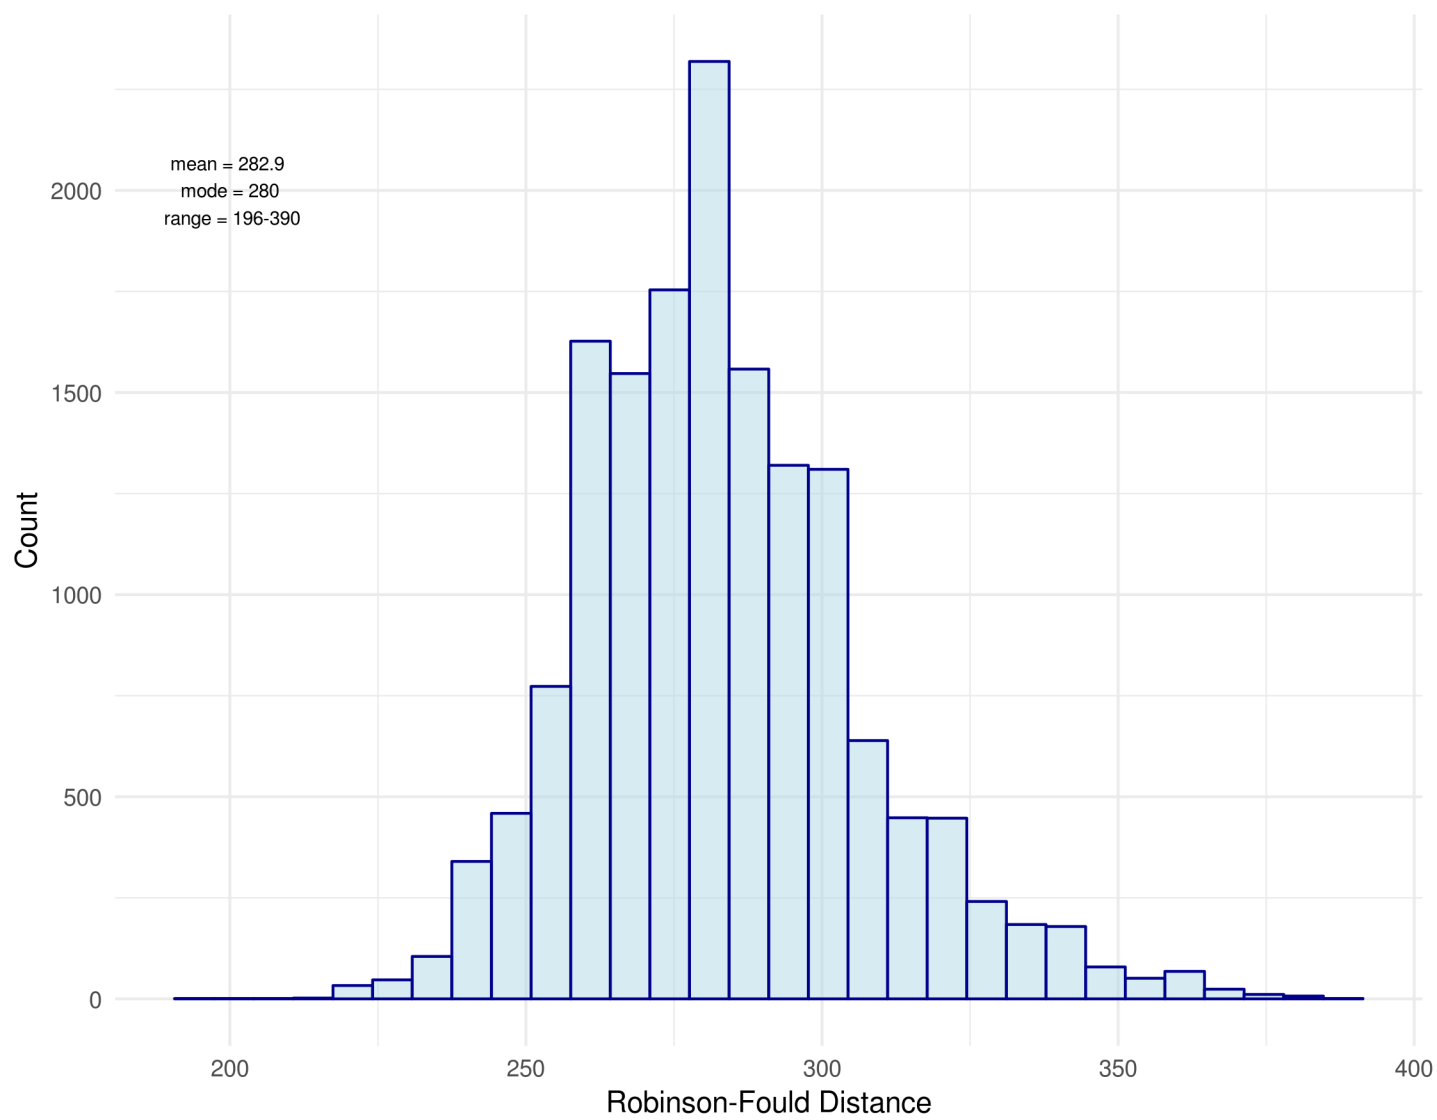

Supplement: peerj-06-5839-s006.pdf [file peerj-06-5839-s006.pdf]
