# Supplementary material for: Phylogenomics picks out the par excellence markers for species phylogeny in the genus Staphylococcus
Source: PeerJ journal article supplement (doi:10.7717/peerj.5839), 2018-10-24

0.02

rpoB  
Phi test p value:0.0000282

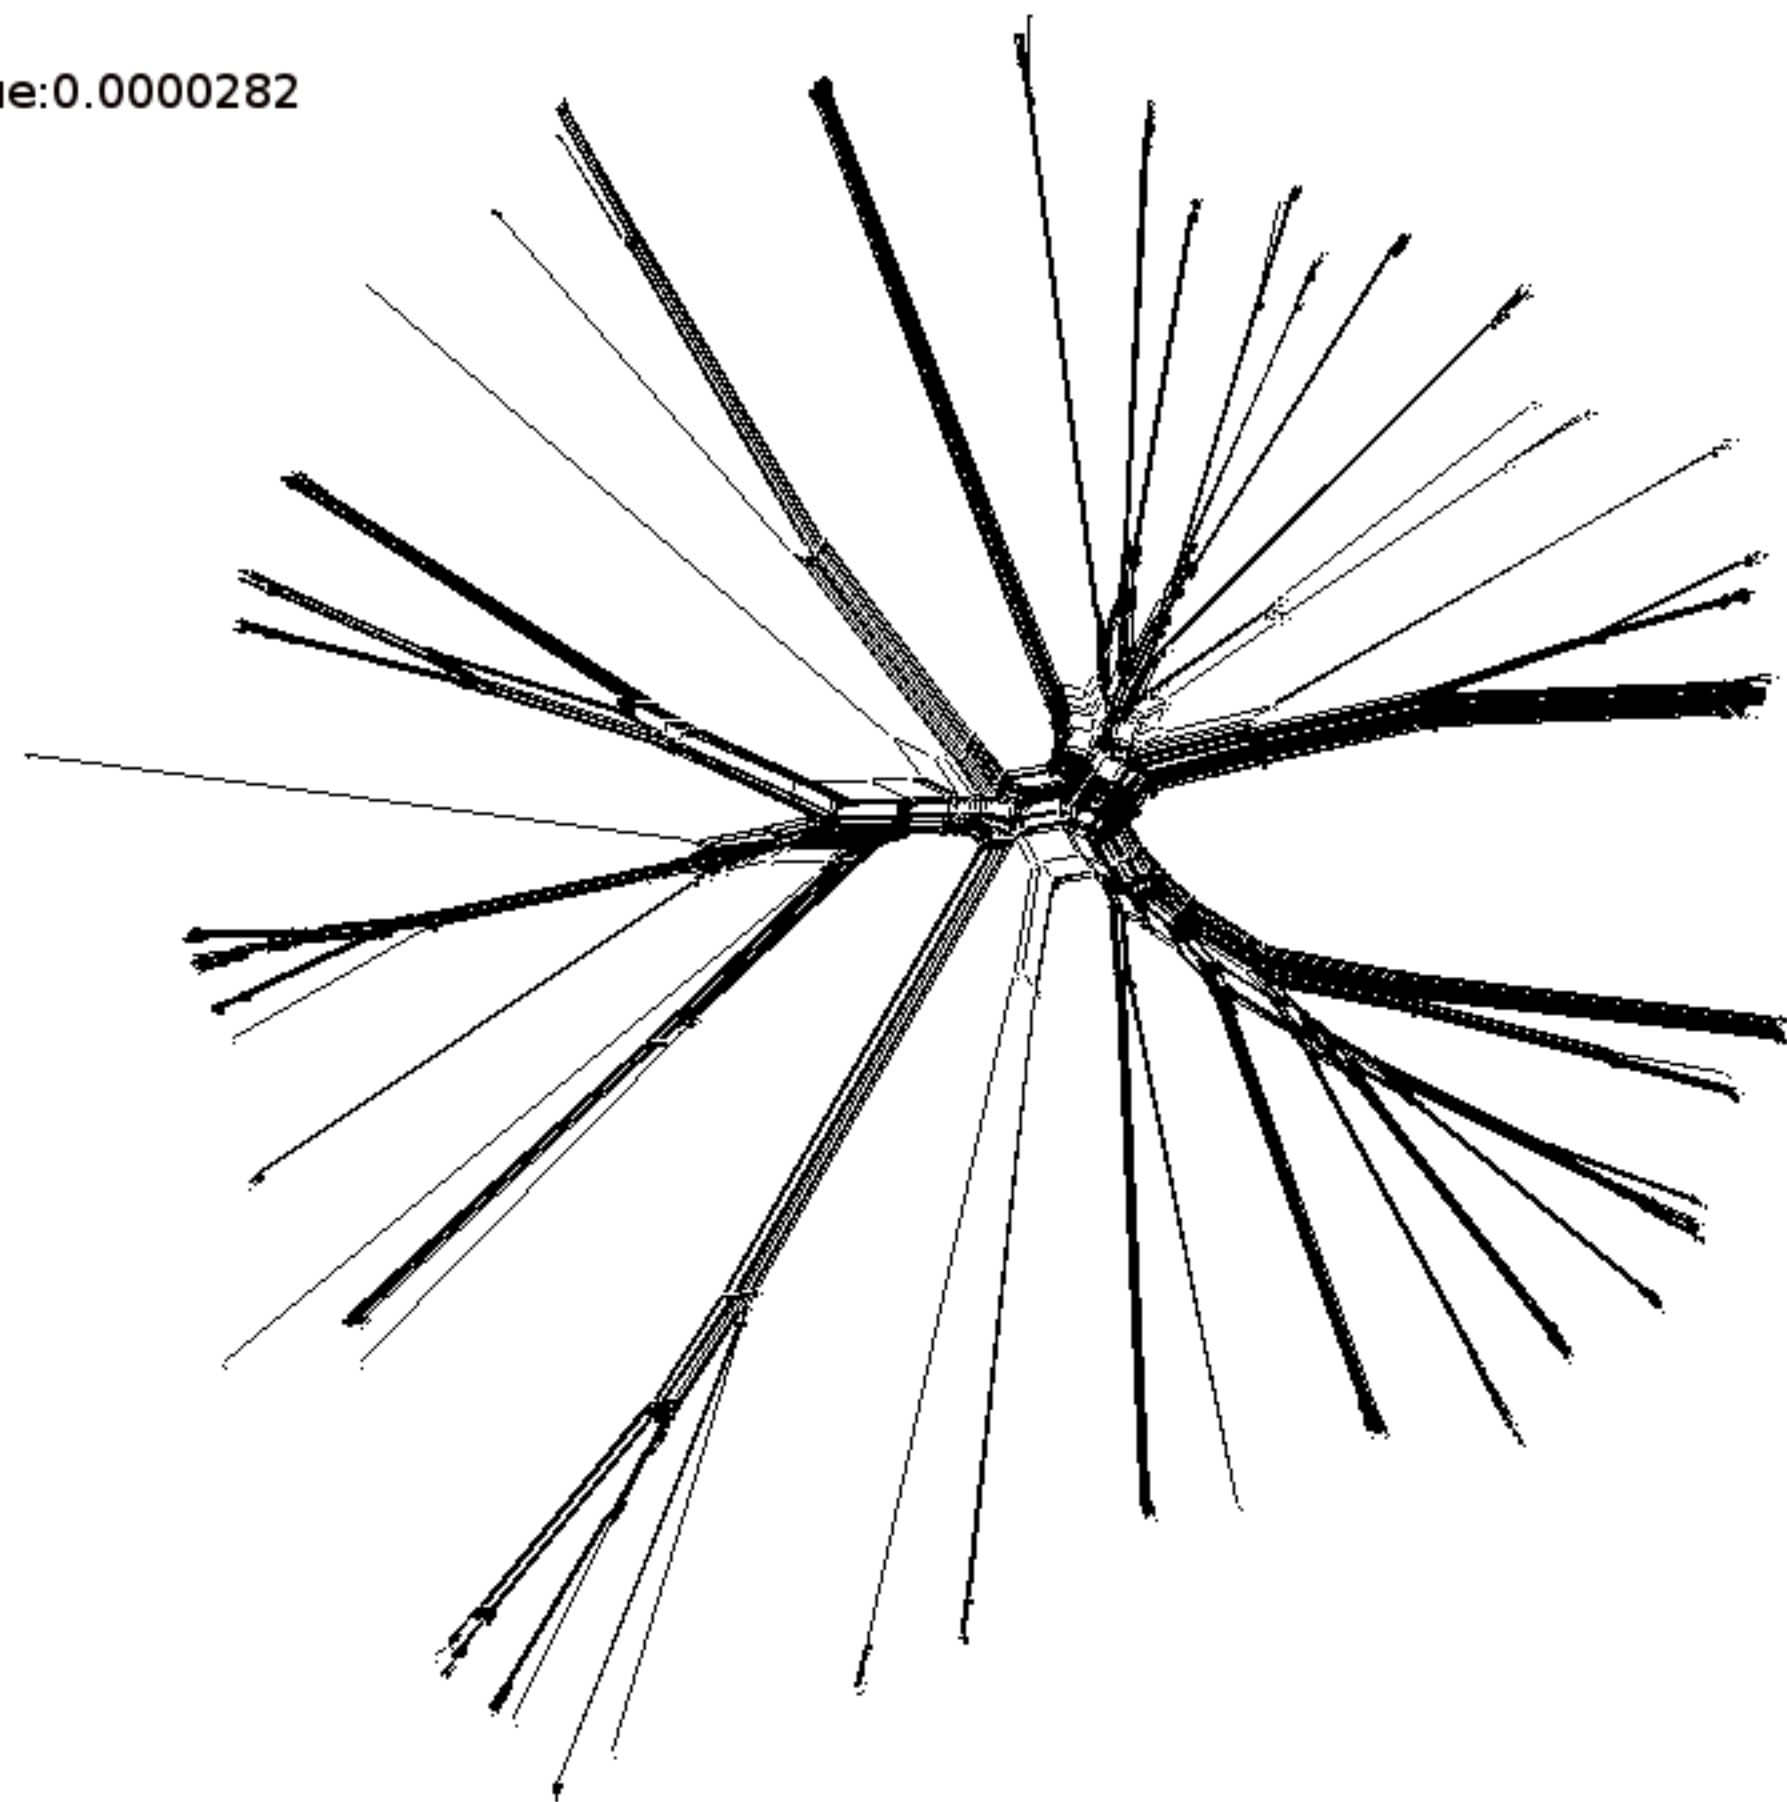

0.02

tuf  
Phi test p value:0.0000804

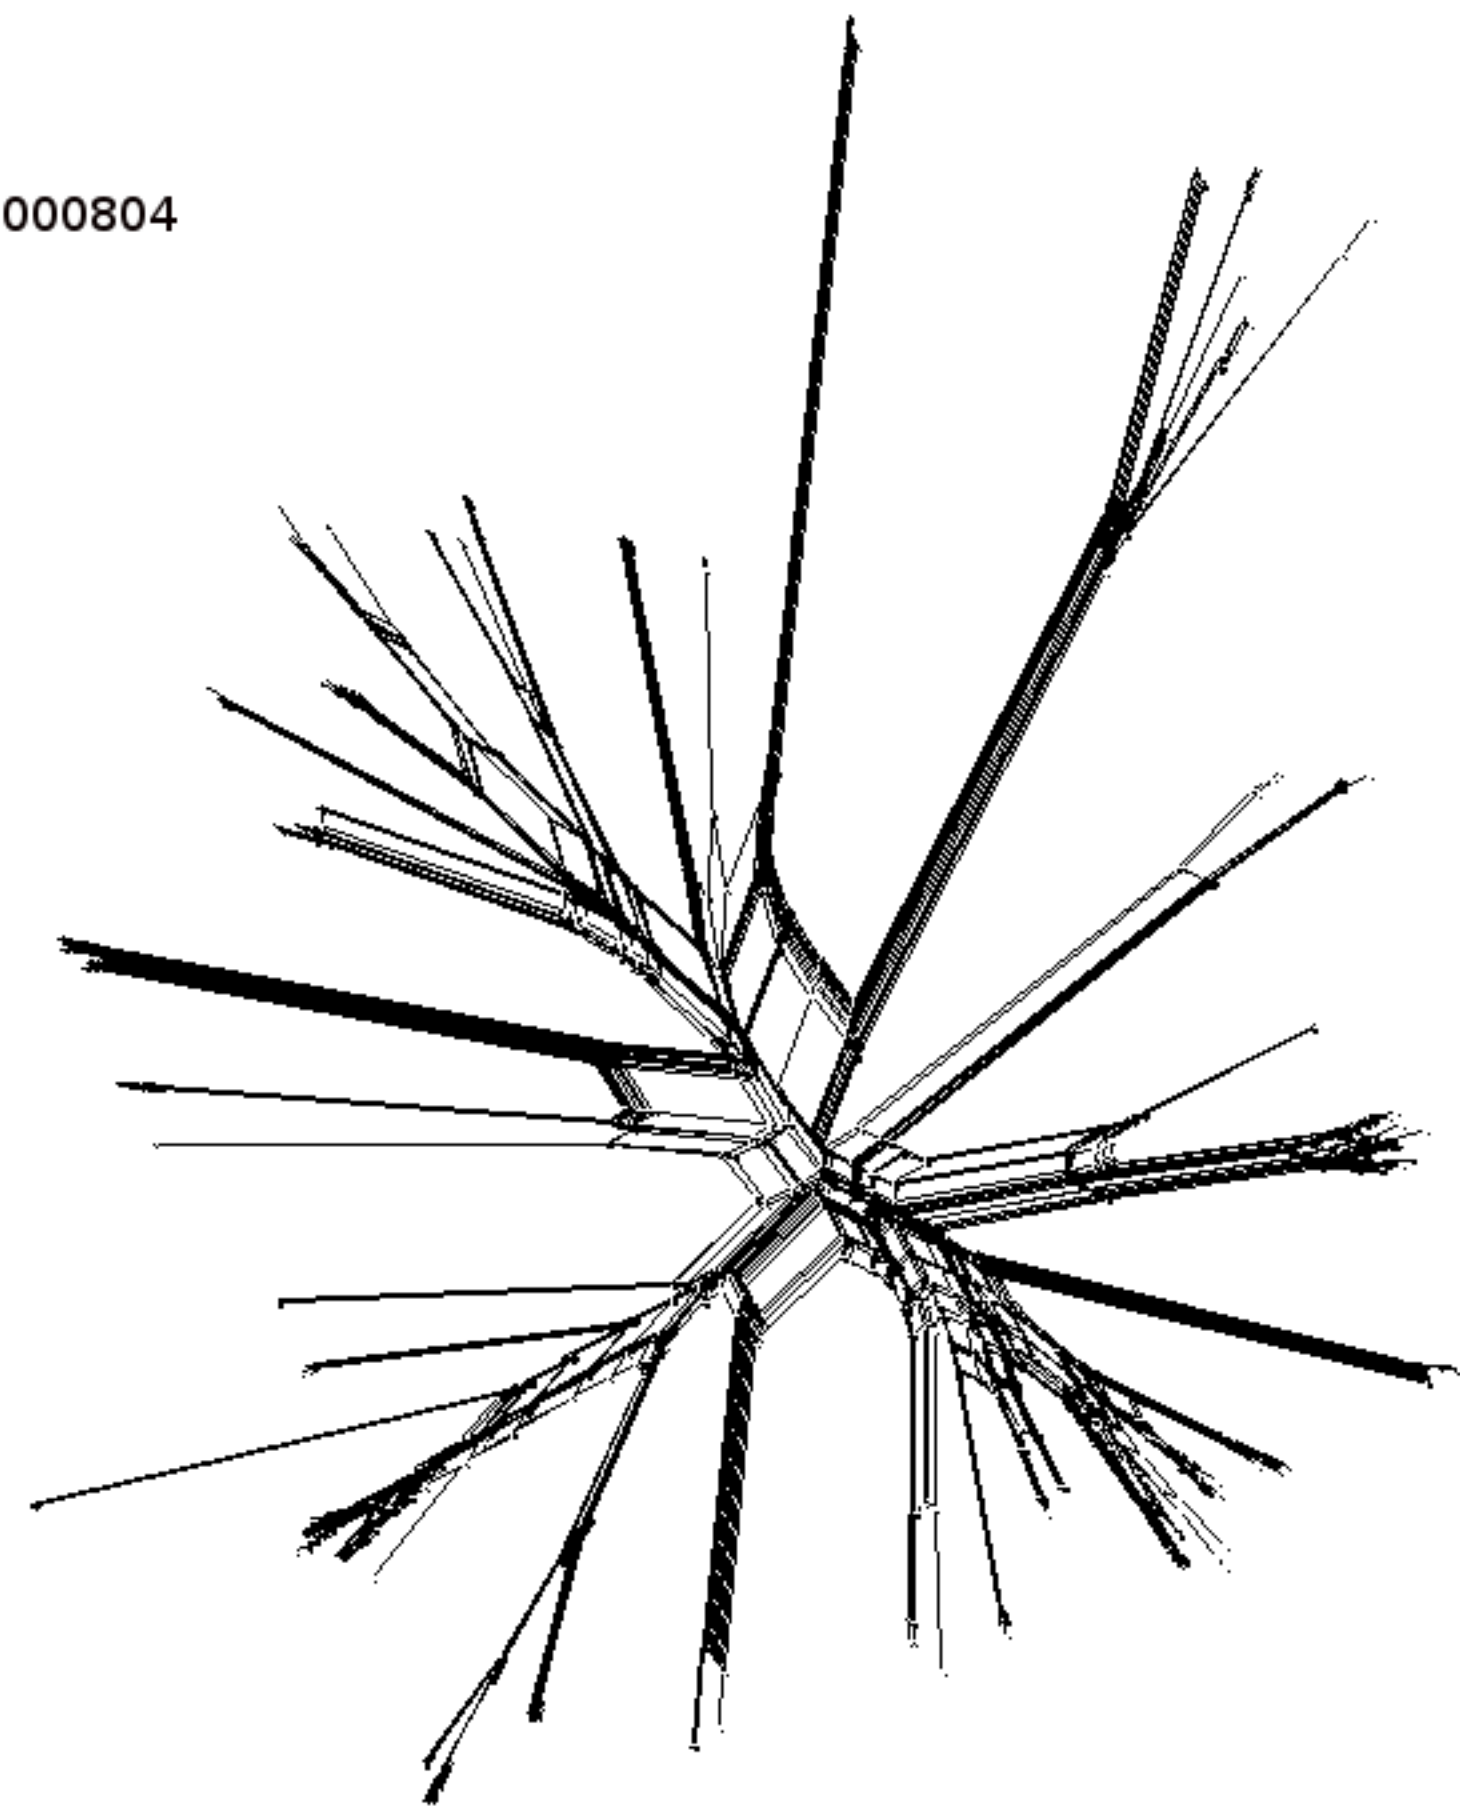

Supplement: SupplementaryFigure1.pdf [file SupplementaryFigure1.pdf]
